# Supplementary material for: Acanthamoeba polyphaga de novo transcriptome and its dynamics during Mimivirus infection
Source: PubMed Central journal article supplement — Sci Rep. 2024 Oct 29;14:25894. doi: 10.1038/s41598-024-76078-6 (PMC11522460; doi:10.1038/s41598-024-76078-6), 2024-10-29
Supplement: 41598_2024_76078_MOESM7_ESM.pdf [file 41598_2024_76078_MOESM7_ESM.pdf]

Supplementary table 2: Primers used for Sanger sequencing.

| Gene name                                           | Sequence              |
|-----------------------------------------------------|-----------------------|
| NODE_3507_length_3801_cov_287.490107_g1332_i0_4_Fr  | GTTGTACCAGCCCGTGATCT  |
| NODE_3507_length_3801_cov_287.490107_g1332_i0_4_Re  | GCACCAAGACCATCAAGGAT  |
| NODE_10194_length_2189_cov_334.651786_g3124_i2_4_Fr | CCATTCTTTTCGATGGCTGT  |
| NODE_10194_length_2189_cov_334.651786_g3124_i2_4_Re | CTTTGGCTTCTCCGACTCTG  |
| NODE_10326_length_2171_cov_27.087678_g3450_i0_4_Fr  | CGGTATCCGTTGTCTCTGGT  |
| NODE_10326_length_2171_cov_27.087678_g3450_i0_4_Re  | TCCATATGCCTAGCCGACTC  |
| NODE_29952_length_617_cov_2.156475_g11635_i0_4_Fr   | CCAAGCAGAACTTCCACCTC  |
| NODE_29952_length_617_cov_2.156475_g11635_i0_4_Re   | GCAGGAGCGACGACTTAGAA  |
| UnnamedSample_HQ_transcript_125_1_Fr                | CCTCGACGAAGACGAAAAAG  |
| UnnamedSample_HQ_transcript_125_1_Re                | GAGAACCGGGTGTACTGGAA  |
| UnnamedSample_HQ_transcript_15376_3_Fr              | AGGGATTTCTCGCCCTCTAC  |
| UnnamedSample_HQ_transcript_15376_3_Re              | GACCGACTTGATGGTGTCTCT |
| UnnamedSample_HQ_transcript_16148_2_Fr              | CCACGGTCTACAACGACCTT  |
| UnnamedSample_HQ_transcript_16148_2_Re              | CGGCAGGTAGAATTCGTAGG  |
| UnnamedSample_HQ_transcript_16178_1_Fr              | CGCAGAGAGGAAGAAGATGG  |
| UnnamedSample_HQ_transcript_16178_1_Re              | TTCGTGCCTCTGTTGTTGAG  |
| UnnamedSample_HQ_transcript_3435_3_Fr               | CTCGAGCAGAACATCCCTTC  |
| UnnamedSample_HQ_transcript_3435_3_Re               | AGTGGTGTGAGCTCGTCCTT  |
| UnnamedSample_HQ_transcript_4172_3_Fr               | TGAGGAGCGAAACAACCTCT  |
| UnnamedSample_HQ_transcript_4172_3_Re               | TGCTTCTGCTGCTTCTCGTA  |
